# Supplementary material for: New Steroidal Erythrityl Triesters from the Heat Processed Roots of Panax ginseng
Source: Hindawi journal article supplement (doi:10.1155/2013/505407), 2013-01-01

# Compound 1 (G-29A):

## <sup>1</sup>H NMR

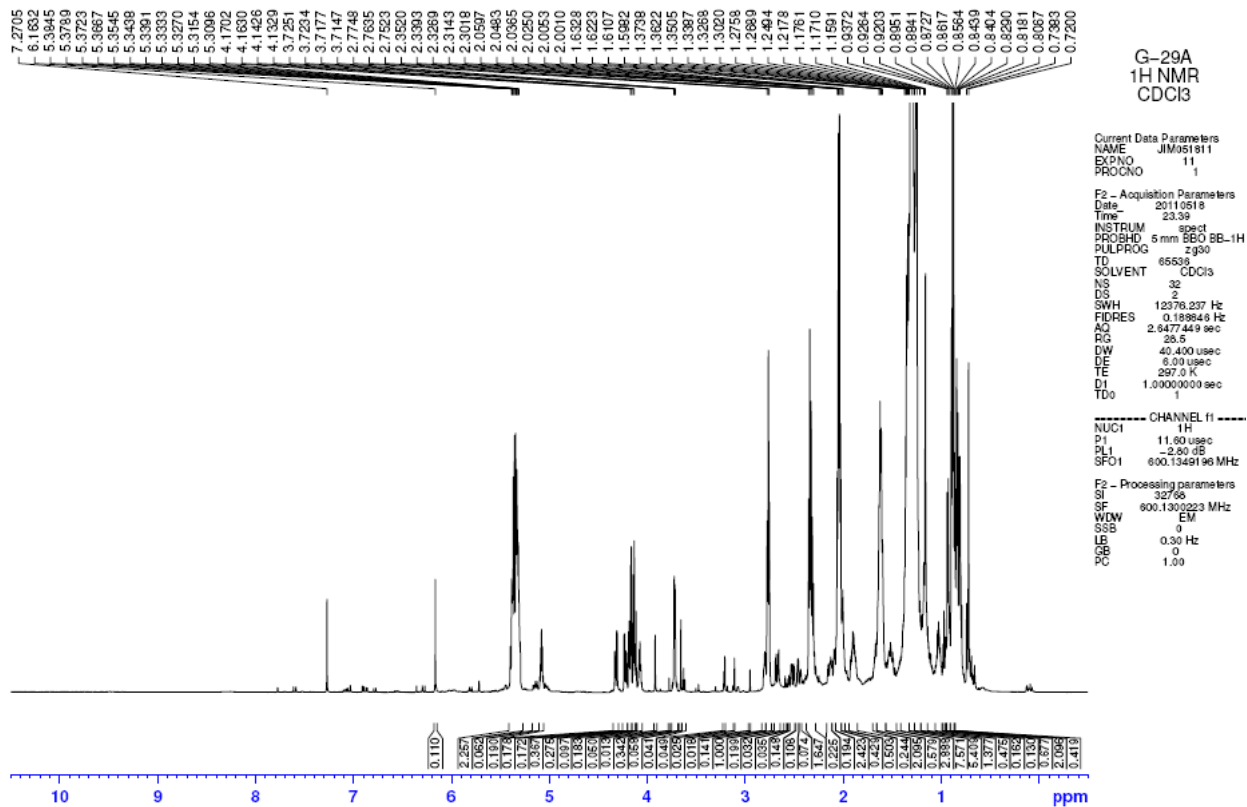

# 13C NMR

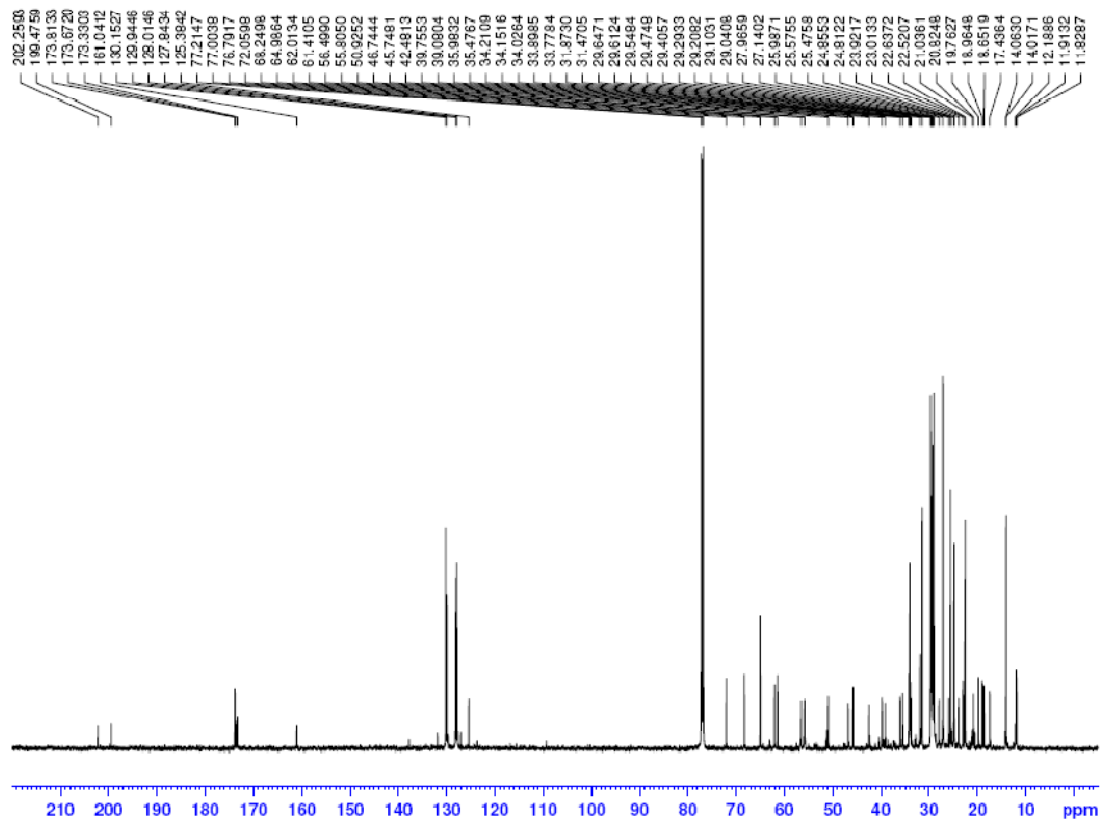

G-29A  
13C NMR  
CDCl3

Current Data Parameters  
 NAME JIM051811  
 EXPNO 23  
 PROCNO 1

F2 - Acquisition Parameters  
 Date 20110519  
 Time 1.01  
 INSTRUM spect  
 PROBHD 5 mm BBO BB-1H  
 PULPROG zgpg30  
 ID 65836  
 SOLVENT CDCl3  
 NS 818  
 DS 5  
 SWH 42372.883 Hz  
 FIDRES 0.64659 Hz  
 AQ 0.7733669 sec  
 RG 322.5  
 DW 11.200 usec  
 DE 8.50 usec  
 TE 297.0 K  
 D1 2.0000000 sec  
 d11 0.0300000 sec  
 DELTA 1.8999999 sec  
 TD0 1

----- CHANNEL f1 -----  
 NUC1 13C  
 P1 10.30 usec  
 PL1 8.50 dB  
 SFO1 150.9194983 MHz

----- CHANNEL f2 -----  
 CPDPRG2 waltz16  
 NUC2 1H  
 PCPD2 7.000 usec  
 PL2 -2.50 dB  
 PL12 12.01 dB  
 PL13 16.80 dB  
 SFO2 600.1324005 MHz

F2 - Processing parameters  
 SI 32768  
 SF 150.9028197 MHz  
 WDW EM  
 SSB 0  
 LB 3.00 Hz  
 GB 0  
 PC 1.40

# COSY

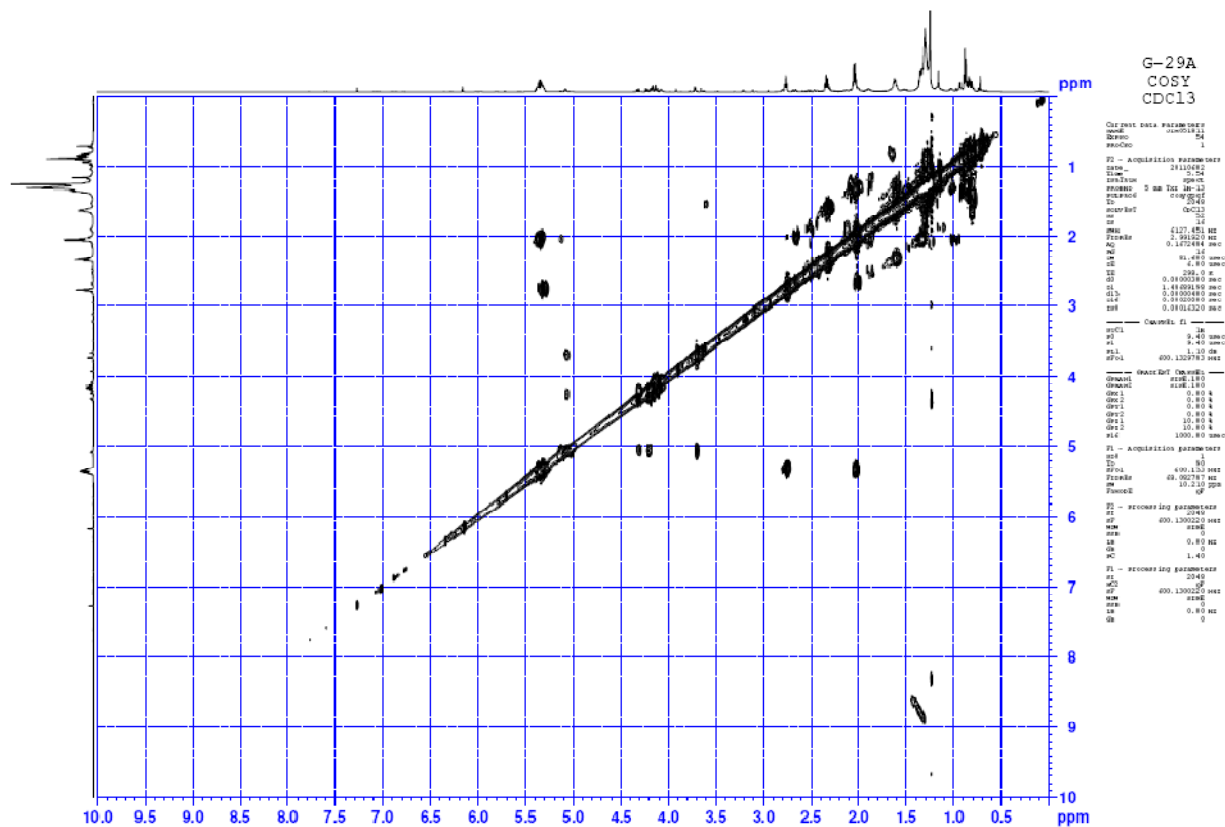



# HMBC

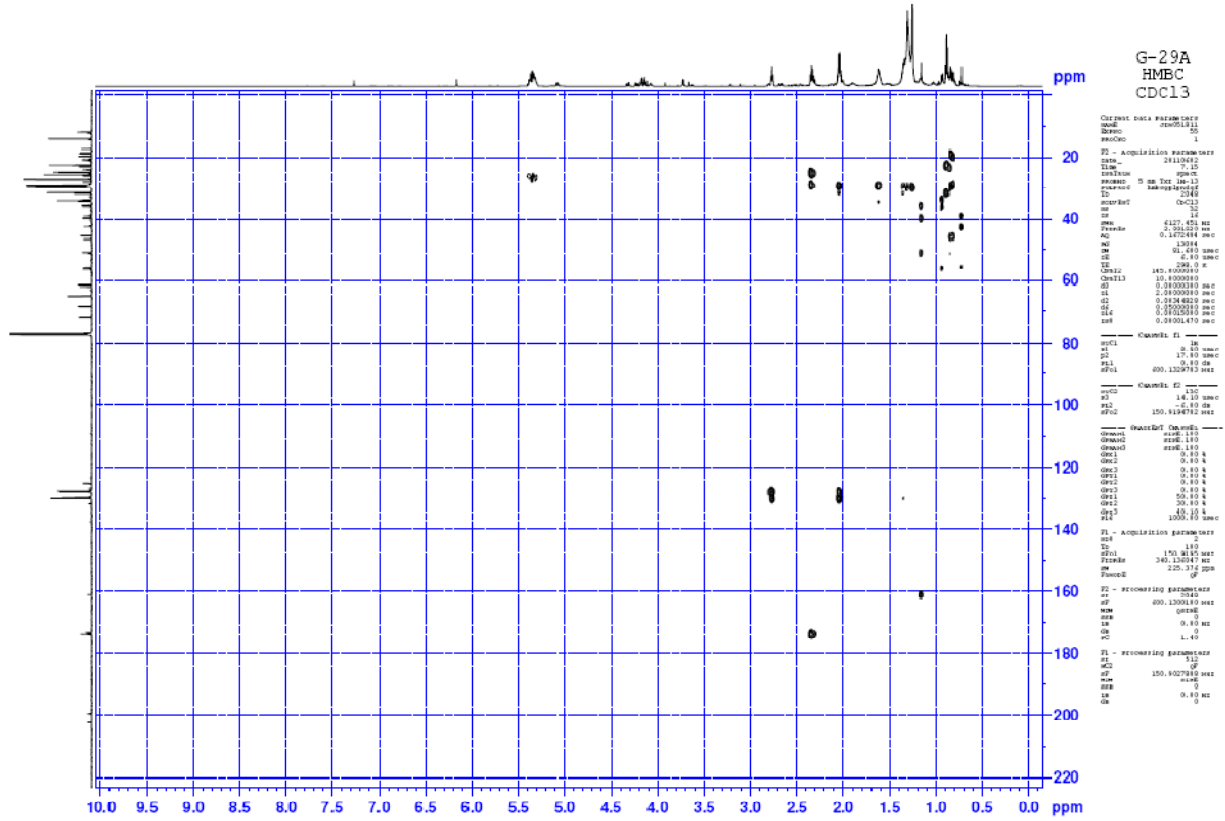

# FAB MS

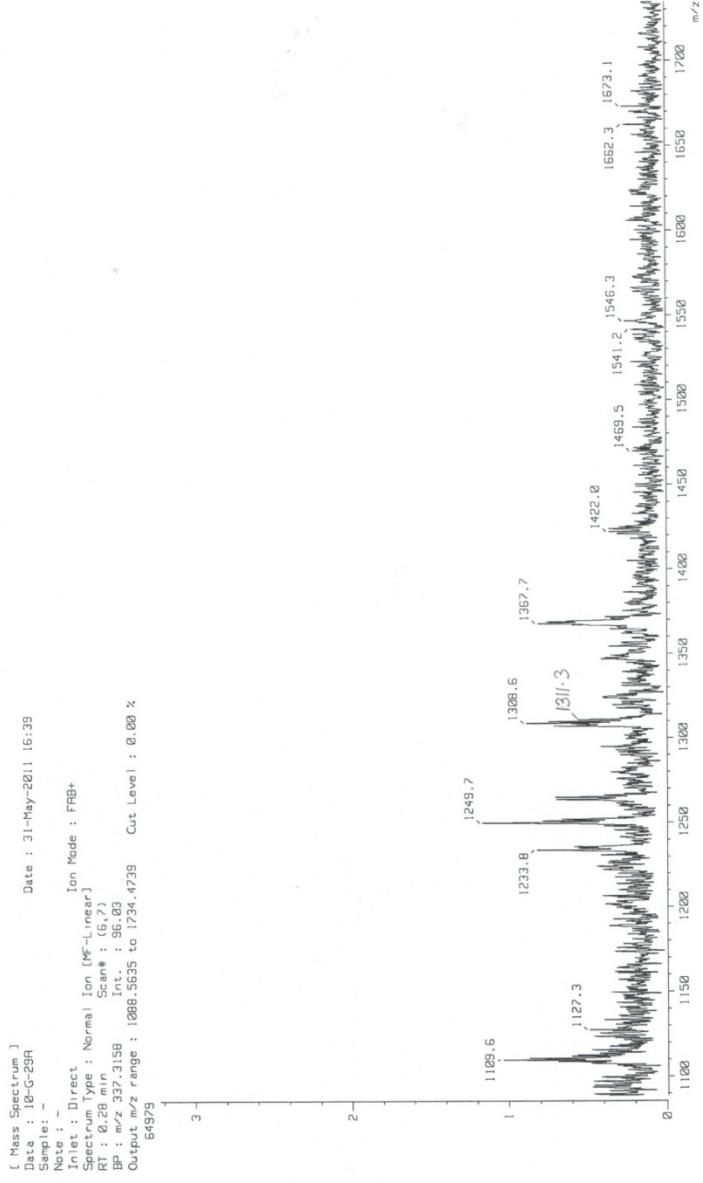

# ESIFT/MS

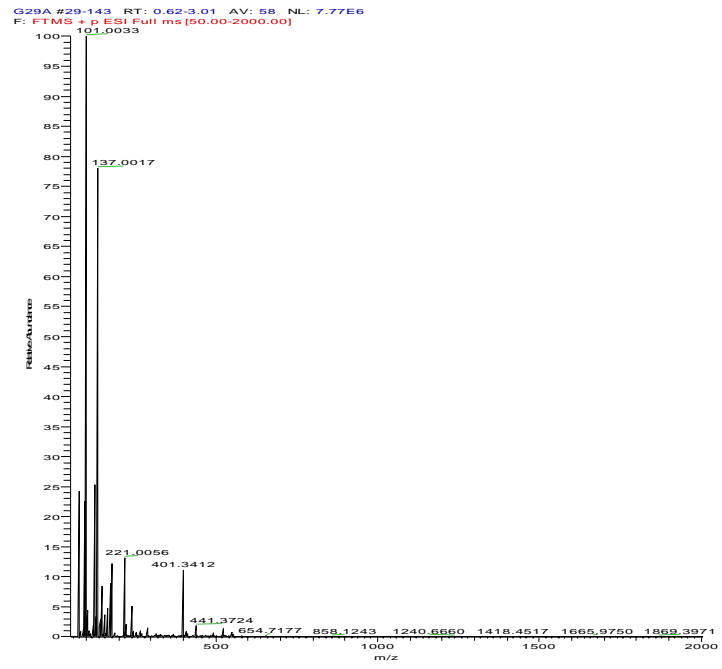

# Compound 2 (G-30A)

## <sup>1</sup>H NMR

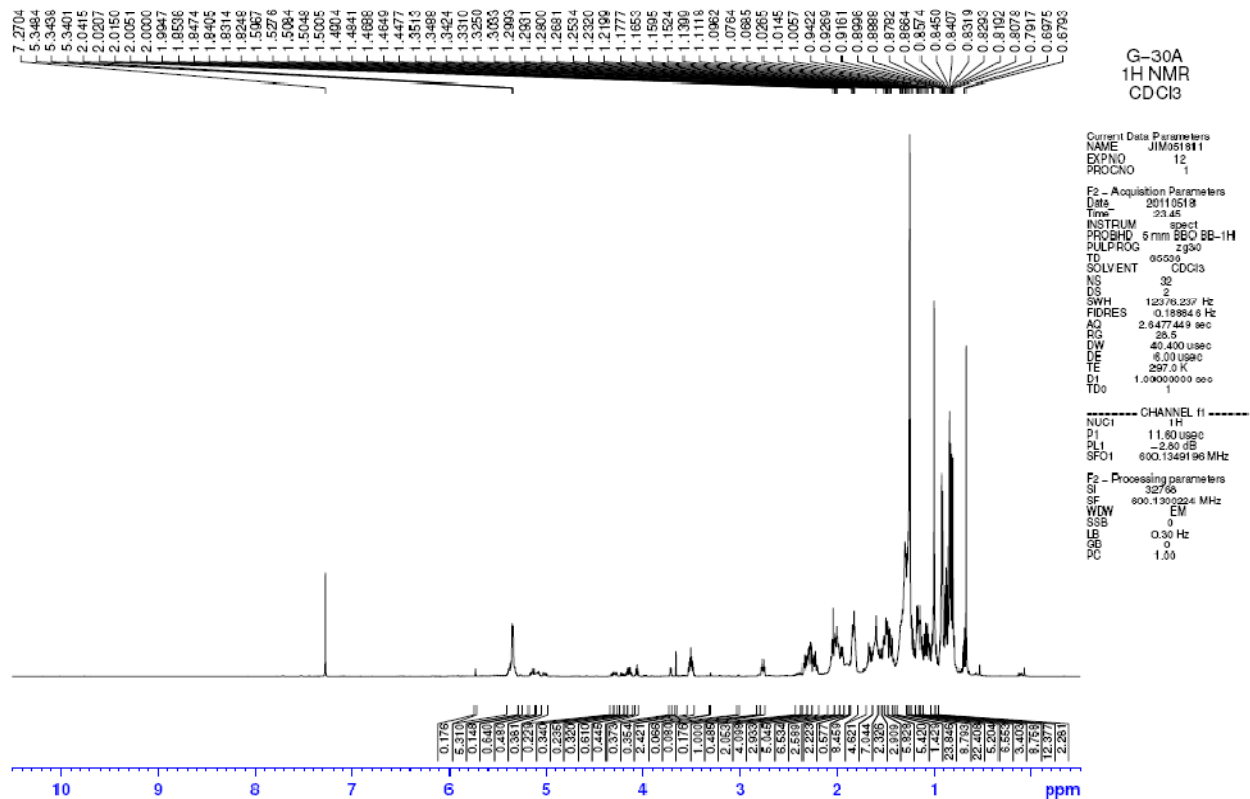



# 13 C NMR

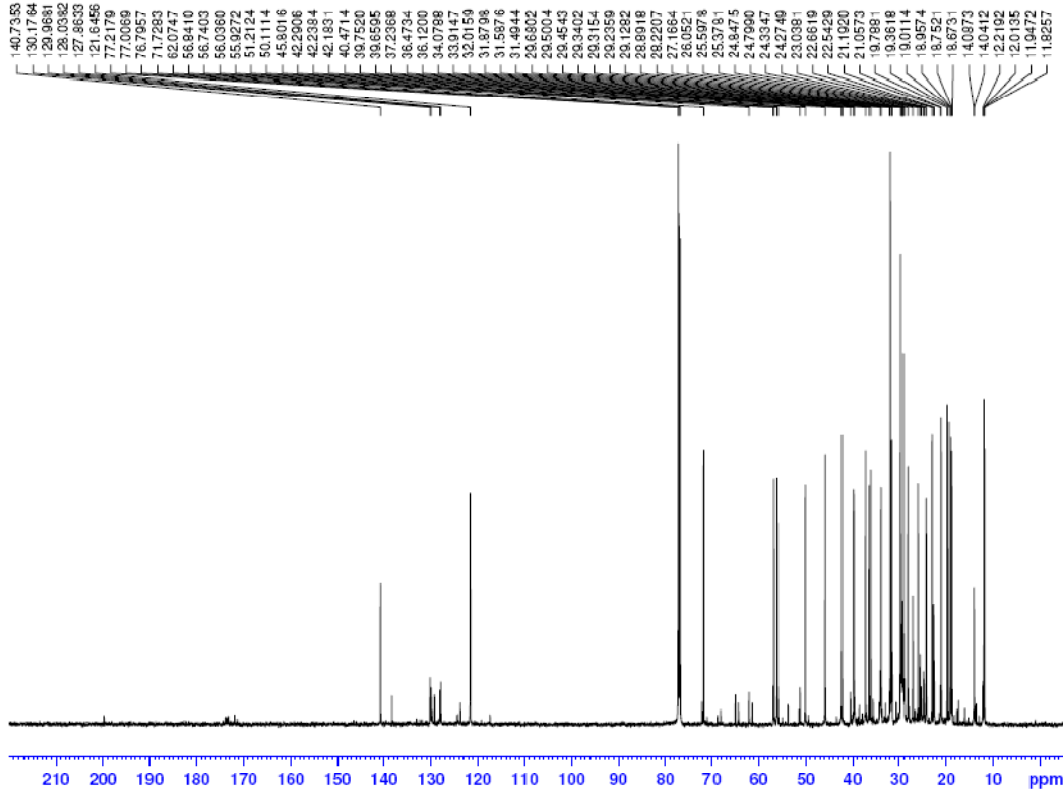

G-30A  
13C NMR  
CDCl3

Current Data Parameters  
NAME JIM981911  
EXPNO 28  
PROCNO 1

F2 - Acquisition Parameters  
Date\_ 20110523  
Time 17:39  
INSTRUM spect  
PROBHD 5 mm BBO BB-1H  
PULPROG zgpg30  
TD 65536  
SOLVENT CDCl3  
NS 1811  
DS 5  
SWH 42372.883 Hz  
FIDRES 0.646559 Hz  
AQ 0.7733659 sec  
RG 181  
DW 11.800 usec  
DE 6.00 usec  
TE 297.0 K  
D1 2.00000000 sec  
d11 0.03000000 sec  
DELTA 1.89000000 sec  
TD0 1

----- CHANNEL f1 -----  
NUC1 13C  
P1 10.30 usec  
PL1 8.50 dB  
SFO1 150.9194083 MHz

----- CHANNEL f2 -----  
CPDPRG2 waltz16  
NUC2 1H  
PCPD2 70.00 usec  
PL2 -2.80 dB  
PL12 12.81 dB  
PL13 18.50 dB  
SFO2 600.1362470 MHz

F2 - Processing parameters  
SI 32736  
SF 150.9028173 MHz  
WDW EM  
SSS 0  
LB 3.00 Hz  
GB 0  
PC 1.40

# COSY

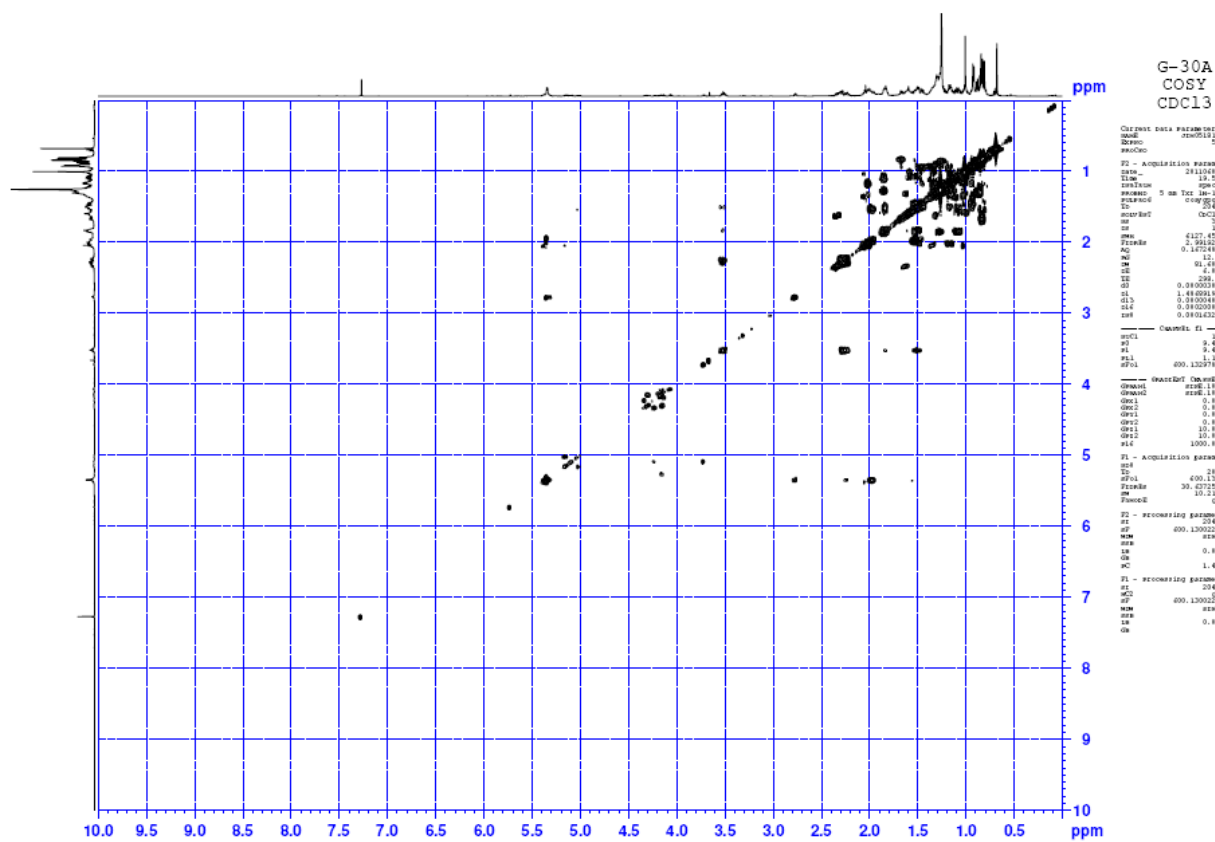

G-30A  
COSY  
CDCl3

```

Output data parameters
NAME      2000111
Date_    5
PROCNO    1
----- Acquisition parameters
Date_    211111
Time     12.55
INSTRUM   spect
PROBHD    5 mm TCI 1H-13
PULPROG   zgpg30
TD        32768
AQ        0.163343 sec
RG        32
SF        400.146 MHz
FIDRES    2.941324 Hz
AQRES    0.163343 sec
RGRES    12
NUC1      13
NUC2      1H
PC        1.40 sec
DE        2.00
TE        300.2 K
SI        0.8000130 sec
SFO1      400.146 MHz
SFO2      100.628150 MHz
SF12      0.8000130 sec
SF122     0.8000130 sec
SF123     0.8000130 sec
----- Channel f1 -----
NUC1      13
P1        8.00 sec
PL        0.00 dB
SFO1      400.146130 MHz
SFO2      100.628150 MHz
----- Channel f2 -----
GAINF2    212.110
SHF2F2    212.110
GMR2      0.40 K
GMR3      0.40 K
GMR4      0.40 K
GMR5      0.40 K
GMR6      10.10 K
GMR7      10.10 K
SFO2      100.628150 MHz
----- Acquisition parameters
Date_    211
Time     12.55
INSTRUM   spect
PROBHD    5 mm TCI 1H-13
PULPROG   zgpg30
TD        32768
AQ        0.163343 sec
RG        32
SF        400.146 MHz
FIDRES    2.941324 Hz
AQRES    0.163343 sec
RGRES    12
NUC1      13
NUC2      1H
PC        1.40 sec
DE        2.00
TE        300.2 K
SI        0.8000130 sec
SFO1      400.146130 MHz
SFO2      100.628150 MHz
SF12      0.8000130 sec
SF122     0.8000130 sec
SF123     0.8000130 sec
----- Processing parameters
SI        32768
SF        400.146130 MHz
SFO1      400.146130 MHz
SFO2      100.628150 MHz
SF12      0.8000130 sec
SF122     0.8000130 sec
SF123     0.8000130 sec
----- Processing parameters
SI        32768
SF        400.146130 MHz
SFO1      400.146130 MHz
SFO2      100.628150 MHz
SF12      0.8000130 sec
SF122     0.8000130 sec
SF123     0.8000130 sec

```

# HSQC

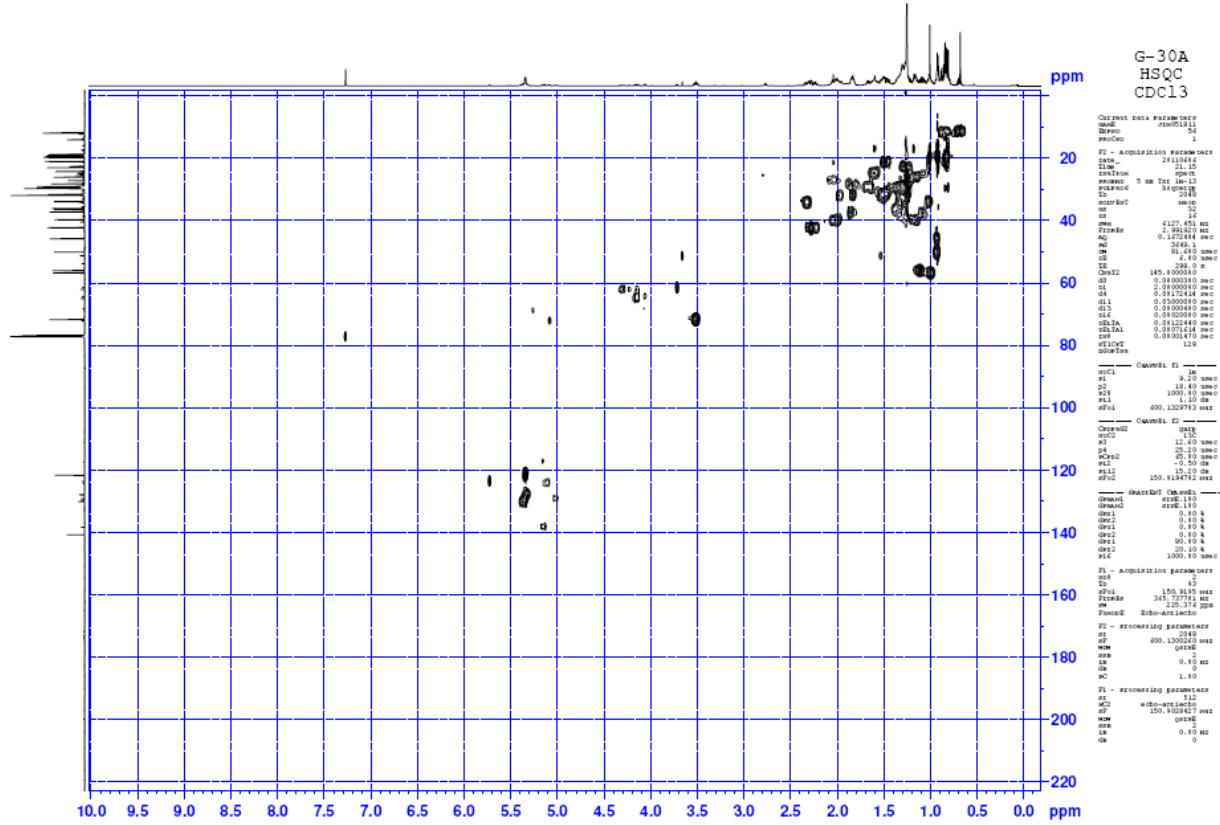

# HMBC

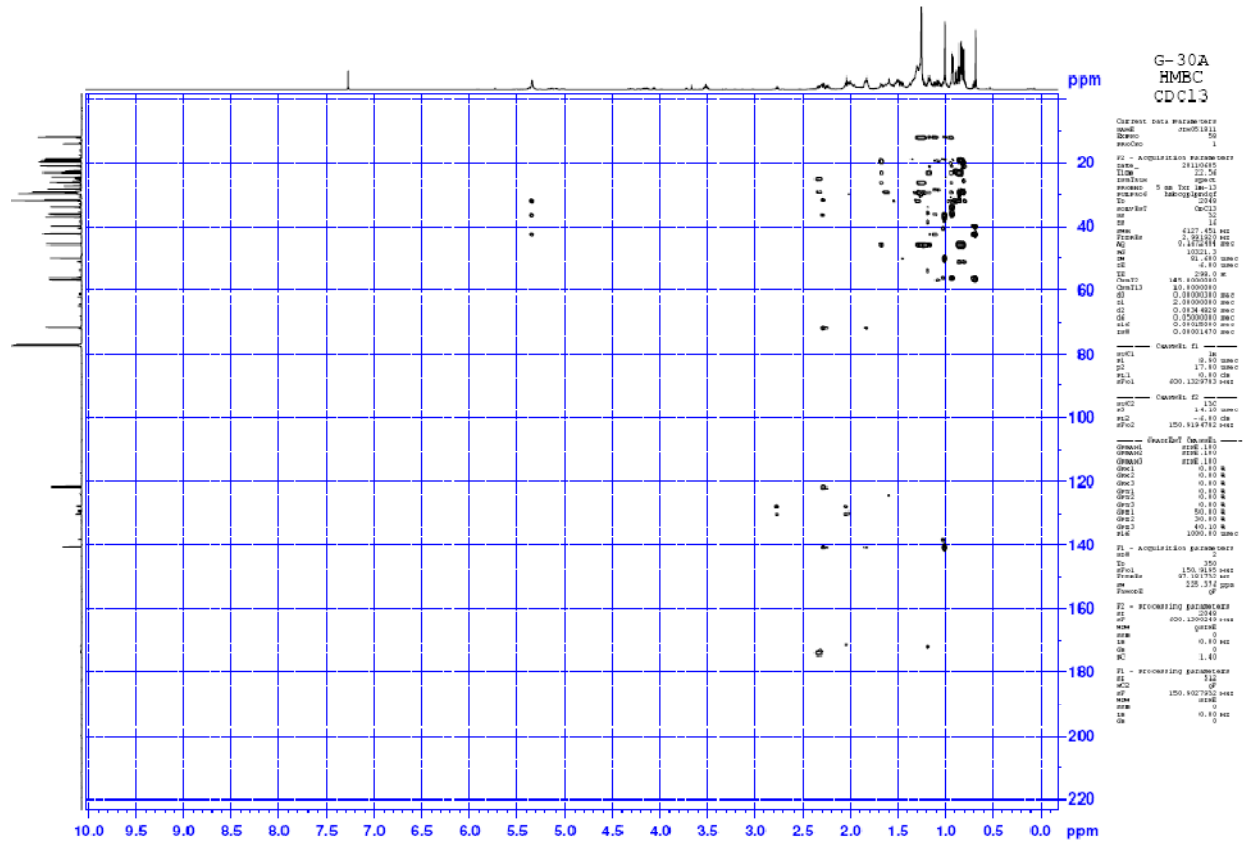

# FAB/MS

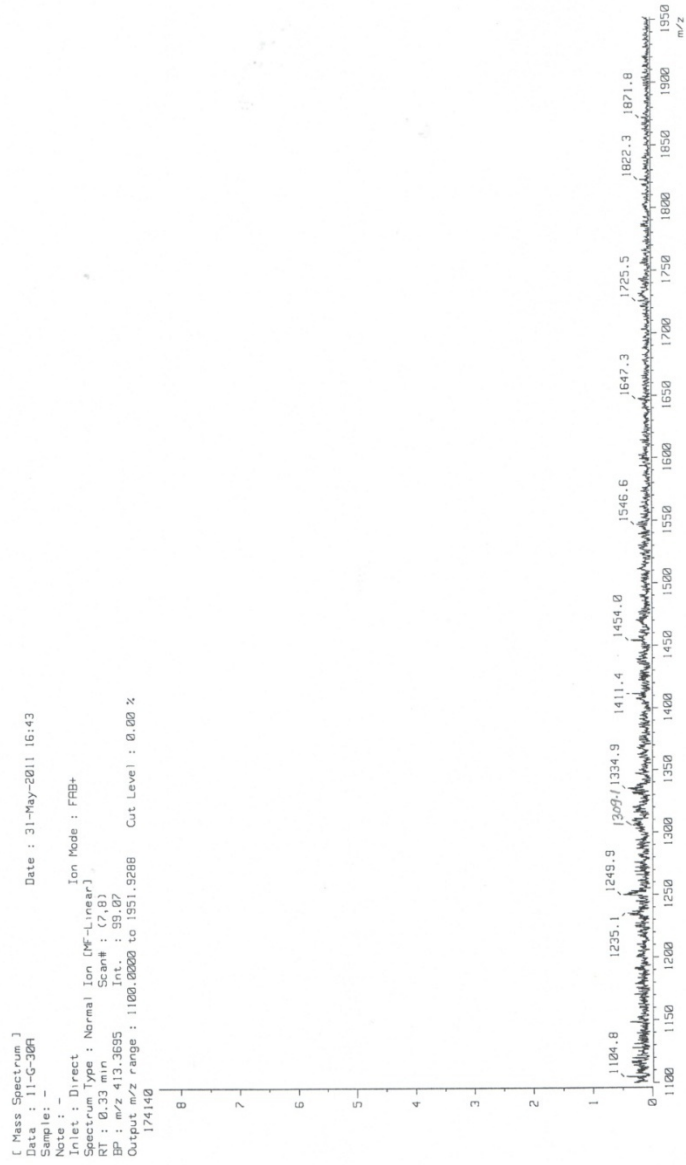

# ESIFT/MS

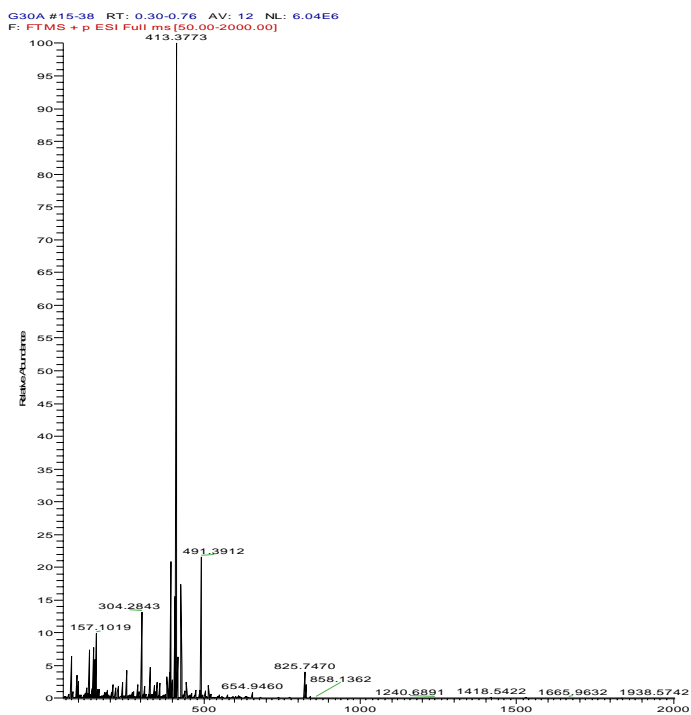

Supplement: f1 [file 505407.f1.pdf]
